# Supplementary material for: The intrinsically disordered protein SPE-18 promotes localized assembly of MSP in Caenorhabditis elegans spermatocytes
Source: Oxford University Press journal article supplement (doi:10.1242/dev.195875), 2021-02-08
Supplement: dev195875supp.pdf [file dev195875supp.pdf]

## SUPPLEMENTARY MATERIAL

**Table S1. *spe-18* genetic mapping data**

### Two-factor mapping

| <b>Genotype</b>           | <b>Recombinants</b> | <b>Segregation</b> |
|---------------------------|---------------------|--------------------|
| <i>unc-4 spe-18</i> / + + | Unc Non-Spe         | 8/72               |
| <i>rol-1 spe-18</i> / + + | Rol Non-Spe         | 13/114             |

### SNIP SNP mapping (Rol Non-Spe recombinants)

| <b>Marker</b> | <b>Genetic</b> | <b>Molecular</b> | <b>Marker N2</b> |
|---------------|----------------|------------------|------------------|
| <i>unc-4</i>  | 1.77           | 9898 kb          |                  |
| <i>rol-1</i>  | 6.90           | 12172 kb         |                  |
| pkP2112       | 13.20          | 12990 kb         | 5/18             |
| pkP2116       | 16.09          | 13235 kb         | 0/18             |
| pkP2154       | 19.17          | 13647 kb         | 1*/17            |

\*presumed double-cross over event

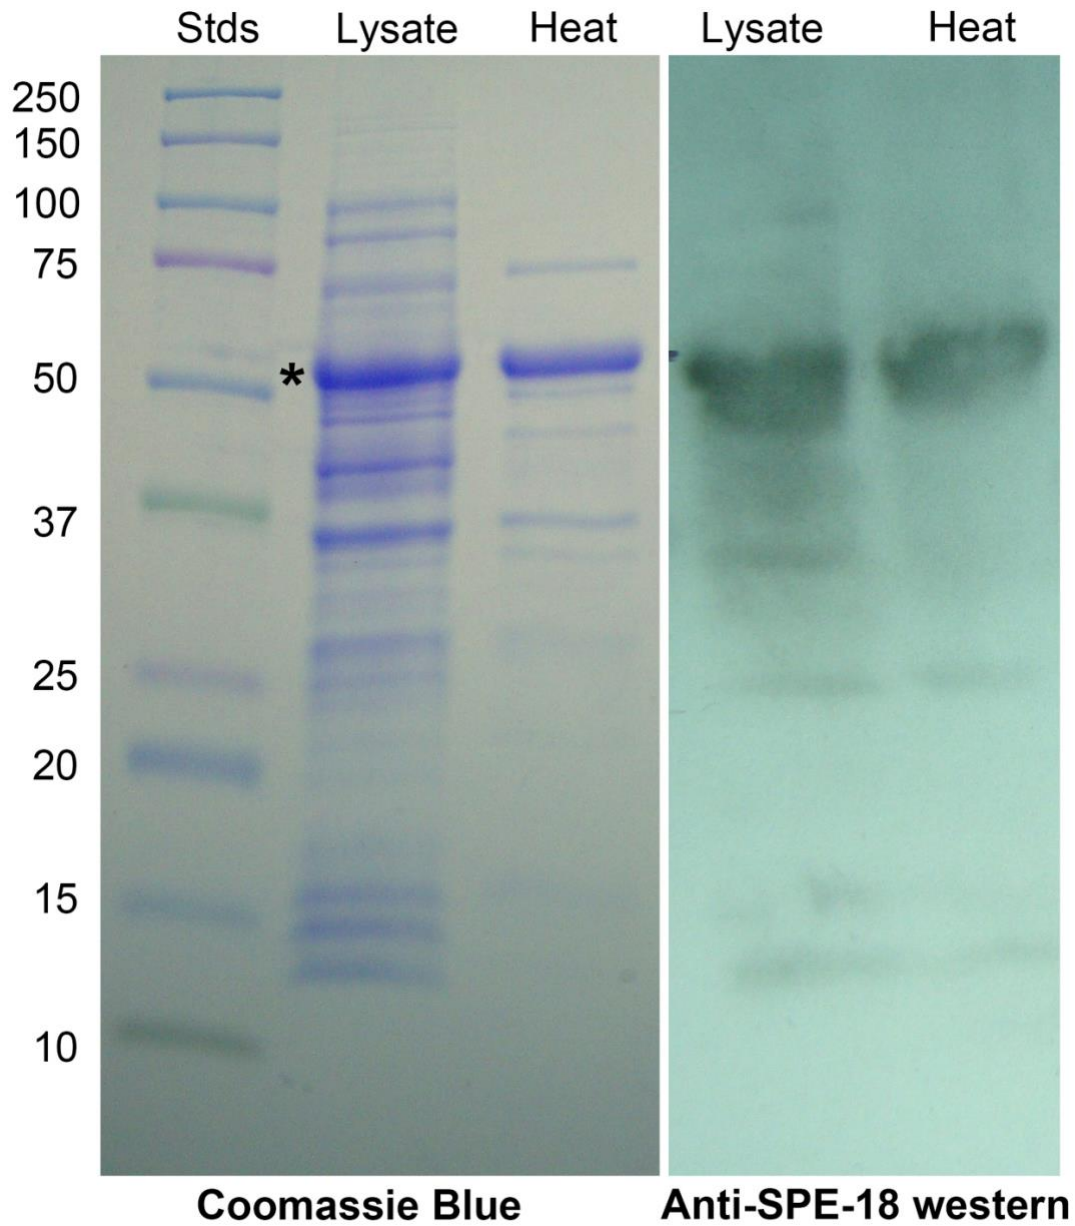

**Figure S1.** Heat treatment of supernatant +/- 95°C heat treatment from *E. coli* expression *C. elegans* SPE-18 fused to an 8.2 kDa Profinity eXact tag (Bio-Rad). The Coomassie blue gel of lysate from induced bacteria and corresponding western blot with anti-SPE-18 antibody (see methods and figure 4 for antibody details).

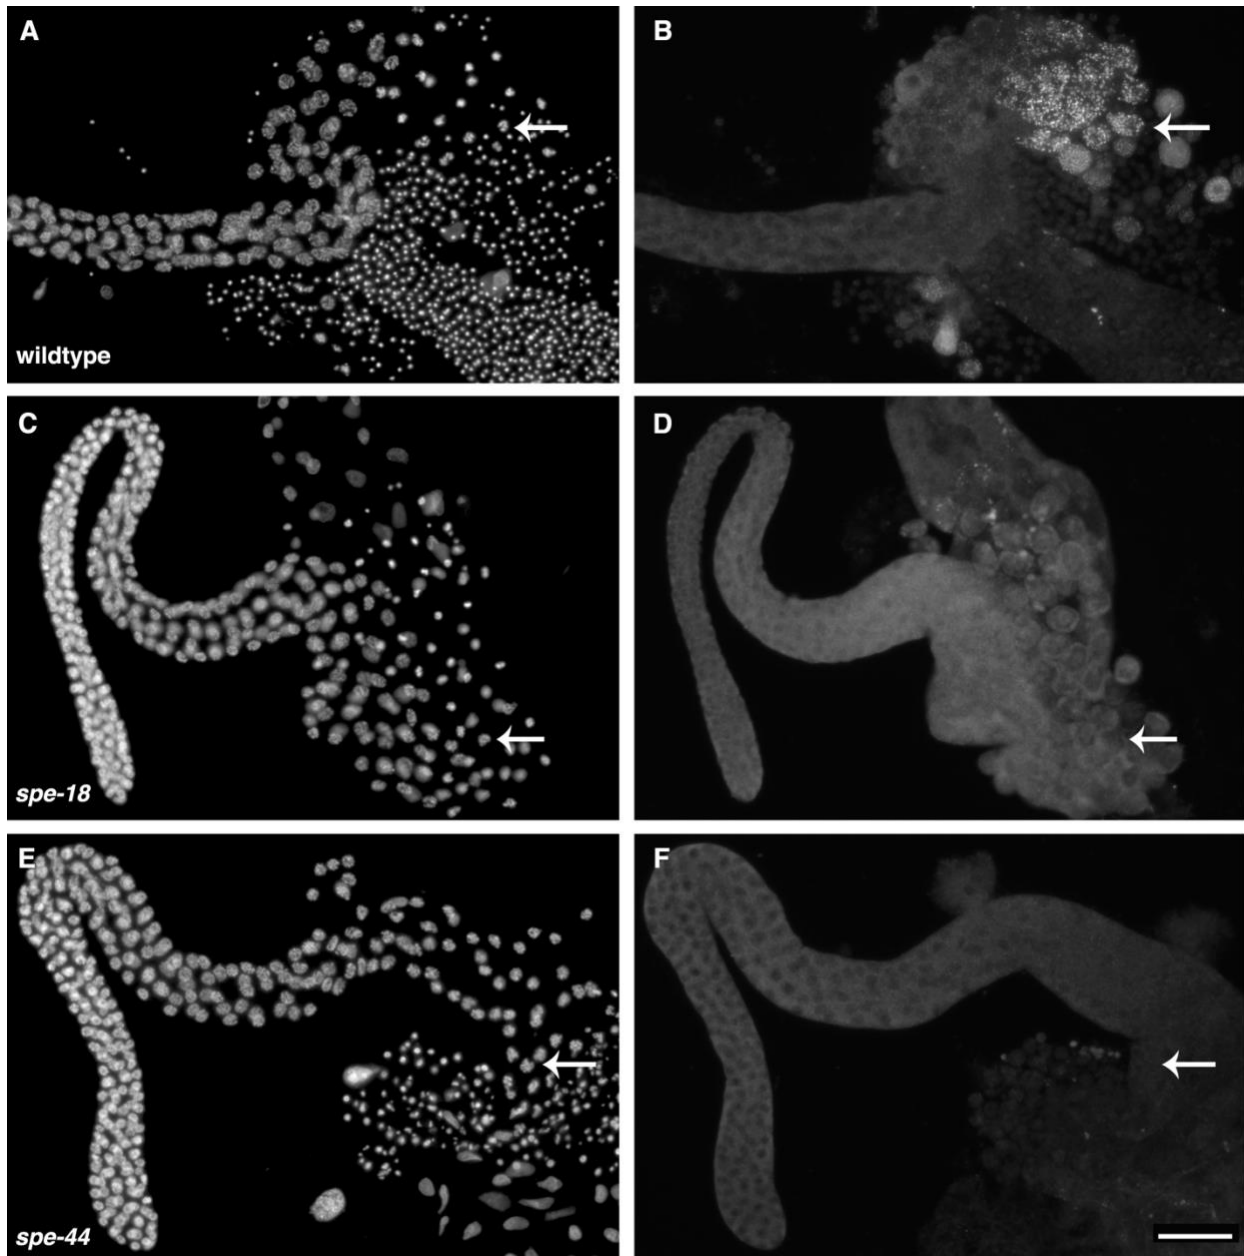

**Figure S2.** Isolated whole gonads from wildtype, *spe-18*, and *spe-44* males co-labelled with DAPI (A,C,E) and anti-SPE-18 antibodies (B,D,F). Arrows indicated metaphase I spermatocytes. Samples were prepared at the same time and photographed with identical exposures. Scale bar = 20 microns.

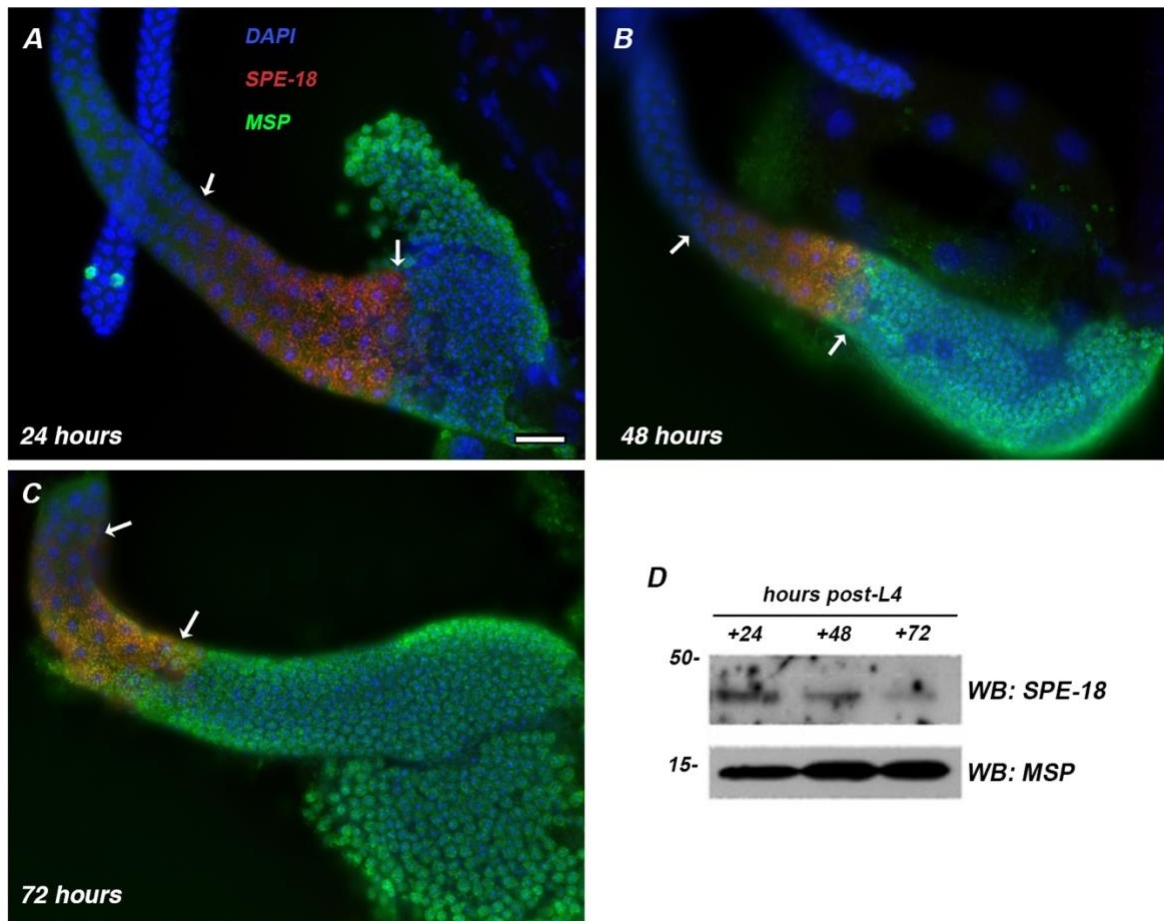

**Figure S3.** Isolated gonads co-labelled with DAPI(blue), anti-SPE-18 (red), and anti-MSP(green) antibody in synchronized, aging celibate wildtype males (A-C) and anti-SPE-18 western blot of sibling male populations (D). Arrows delineate the boundaries of SPE-18 labelling within each gonad. Scale bar = 10 microns.
